# Supplementary material
Source: HighWire-hosted journal article supplement (https://erj.ersjournals.com/content/50/4/1602357)
Supplement: inline-supplementary-material-1 [file inline-supplementary-material-1.pdf]

## Supplementary materials

**Table S1.** The effect of TRAP exposure (NO<sub>2</sub> exposure and living less than 200 metres from a major road from 45 to 50 years) on raw values of lung function adjusted for sex, age, height and other confounding variables (restricted to non-movers, n = 709).

|                                | Adjusted †    |                    |          |
|--------------------------------|---------------|--------------------|----------|
| <i>NO<sub>2</sub> exposure</i> | <b>β (ml)</b> | <b>95% CI (ml)</b> | <b>P</b> |
| <b>FEV<sub>1</sub></b>         | -1.53         | -33.31, 30.25      | 0.93     |
| <b>FVC</b>                     | -4.18         | -41.50, 33.13      | 0.83     |
| <b>FEV<sub>1</sub>/FVC</b>     | 0.65          | 4.97, 3.66         | 0.77     |
|                                |               |                    |          |
| <i>&lt; 200 m</i>              | <b>β</b>      | <b>95% CI</b>      | <b>P</b> |
| <b>FEV<sub>1</sub></b>         | -101.14       | -175.17, -27.10    | 0.01     |
| <b>FVC</b>                     | -94.47        | -180.41, -8.53     | 0.03     |
| <b>FEV<sub>1</sub>/FVC</b>     | 0.01          | 0.02, 0.00         | 0.05     |

† adjusted for age, sex, height, socio economic status, smoking status, rural/urban location, type of cooking and type of heating. β is given per IQR increase in mean annual NO<sub>2</sub> exposure (i.e. 2.4 ppb).

**Table S2.** Mean annual NO<sub>2</sub> levels at residential addresses less and greater than 200 metres from a major road for those who had a geocoded residential address at the ages 45 and 50 years (N=709).

| Follow up                      | Mean annual NO <sub>2</sub> levels at residential addresses |                                 | P*      |
|--------------------------------|-------------------------------------------------------------|---------------------------------|---------|
|                                | < 200 m from a major road (ppb)                             | > 200 m from a major road (ppb) |         |
| <b>45 years – range (mean)</b> | 3.0 – 23.8 (6.7)                                            | 2.4 – 16.2 (4.9)                | <0.0001 |
| <b>50 years – range (mean)</b> | 2.4 – 23.0 (5.9)                                            | 1.8 – 15.5 (4.1)                | <0.0001 |

\*z test to compare means of NO<sub>2</sub> exposure in two groups (<200 m & >200m)

**Table S3.** The effect of TRAP exposure (NO<sub>2</sub> exposure and living less than 200 metres from a major road from 45 to 50 years) on current asthma, current wheeze and lung function additionally adjusted for sample weights (restricted to non-movers, n = 709).

|                                     | Adjusted † |              |          |
|-------------------------------------|------------|--------------|----------|
| <i>NO<sub>2</sub> exposure</i>      | <b>OR</b>  | <b>95%CI</b> | <b>p</b> |
| Current asthma                      | 1.11       | 0.97, 1.27   | 0.14     |
| Current wheeze                      | 1.04       | 0.91, 1.19   | 0.54     |
|                                     | <b>β</b>   | <b>95%CI</b> | <b>p</b> |
| zFEV <sub>1</sub> <sup>*</sup>      | -0.02      | -0.09, 0.04  | 0.45     |
| zFVC <sup>*</sup>                   | 0.00       | -0.06, 0.06  | 0.96     |
| zFEV <sub>1</sub> /FVC <sup>*</sup> | -0.04      | -0.10, 0.02  | 0.17     |
|                                     |            |              |          |
| <i>&lt; 200 m</i>                   | <b>OR</b>  | <b>95%CI</b> | <b>p</b> |
| Current asthma                      | 1.48       | 1.07, 2.04   | 0.02     |
| Current wheeze                      | 1.64       | 1.20, 2.24   | 0.00     |
|                                     | <b>β</b>   | <b>95%CI</b> | <b>p</b> |
| zFEV <sub>1</sub> <sup>*</sup>      | -0.30      | -0.47, -0.14 | <0.01    |
| zFVC <sup>*</sup>                   | -0.19      | -0.34, -0.03 | 0.02     |
| zFEV <sub>1</sub> /FVC <sup>*</sup> | -0.19      | -0.34, -0.04 | 0.01     |

† adjusted for age, sex, height, socio economic status, smoking status, rural/urban location, type of cooking, type of heating and sample weights. β is given per IQR increase in mean annual NO<sub>2</sub> exposure (i.e. 2.4 ppb).
